# ANNOUNCEMENT

## YEAR 2004 LAUREATE OF THE HISTORY OF ANESTHESIA

**Nicholas M. Greene, M.D., Honorary Chairman**

**Doris K. Cope, M.D., Chairman**

Nominations are invited for the person to be named the Third Wood Library-Museum Laureate of the History of Anesthesia in the year 2004.

This Wood Library-Museum Program, established in 1994, has as its purpose creation for increased recognition of the richness and importance of the history of our specialty by recognizing the work of scholars who have made singular contributions to the field. The honor is awarded every four years by the WLM Laureate Committee to an individual who has a demonstrable record of contributing over the years outstanding, original materials related to the history of our specialty, as reflected by articles published in peer-reviewed journals and/or in monographs. The first Laureate, Dr. Gwenifer Wilson of Sydney, Australia, was honored in 1996. The second Co-Laureates were Norman A. Bergman, M.D., F.R.C.A., and Thomas B. Boulton, M.D., Ch.B., F.R.C.A.

The Laureate Program is international. Nominations for the award are sought by physicians, not just anesthesiologists, as well as medical historians, regardless of where they live. All nominations, to be received by July 1, 2003, must include one hard copy of each of five sets of materials. These include:

1. An English language copy of the nominee's curriculum vitae;
2. A copy of the nominee's bibliography;
3. A letter of nomination in English providing a detailed assessment of the value and merit of the nominee's scholarly achievements in the field of the history of anesthesia (this letter will be an important determinant in the selection of the Laureate);
4. A letter signed by the nominee stating that his/her permission has been given for submission of his/her name as a candidate for consideration (without such a letter, the nomination cannot be considered); and
5. A copy of what the nominee regards as his/her most important single publication on the history of anesthesia. If this publication is considered to be a monograph, complete data shall be provided about whether the monograph is still in print, on its cost, and where the monograph may be obtained. If the publication is no longer in print, the nomination shall include a copy of each of not less than four reviews of the monograph that appeared in contemporaneous, peer-reviewed journals.

Supporting letters from individuals who know a nominee offered by someone else are helpful but not required.

Nominations offered for the 1996 or 2000 Laureate can be renewed and will be considered for the year 2004 by sending to the WLM an update of the candidate's curriculum vitae, together with updated letters of support.

The name of the individual selected by the Laureate Committee to be the year 2004 Laureate will be announced in October 2003 (at the ASA's Annual Meeting in San Francisco) to ensure that the honoree will be free of other commitments in October 2004, during the annual meeting of the American Society of Anesthesiologists in Las Vegas, Nevada. At the time of the investiture in 2004, the honoree will be given a suitably inscribed medal, an appropriate certificate for framing, and a honorarium of \$3,000. The proceedings do not include a lecture by the newly inducted Laureate, though a 3-4 minute acceptance speech would be in order. The honoree and spouse will be provided round-trip tourist class airfare from their home. A \$175 per diem for 3 days in Las Vegas will be provided.

Although the post of Laureate is not associated with prescribed duties, it carries with it the WLM Trustees' expectation that the Laureate will remain active in the publication of historical materials and will continue to contribute to the education of anesthesiologists and others through lectures and participation in appropriate panels and seminars.

Additional information regarding the Laureate Program may be obtained by contacting, by mail only, the WLM Laureate Committee at the Wood Library-Museum, 520 N. Northwest Highway, Park Ridge, Illinois 60068-2573. Faxes will not be accepted.
